# Supplementary material
Source: Springer Nature journal article supplement (https://www.springermedizin.de/resource/supplementary/13054_2010_8685_MOESM2_ESM.pdf/9732786)

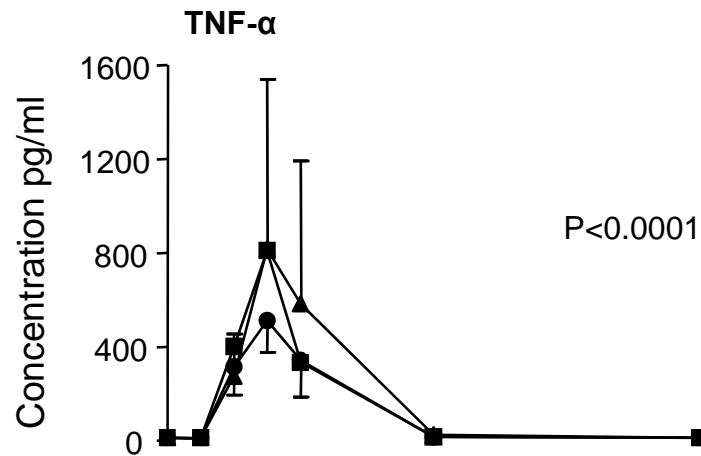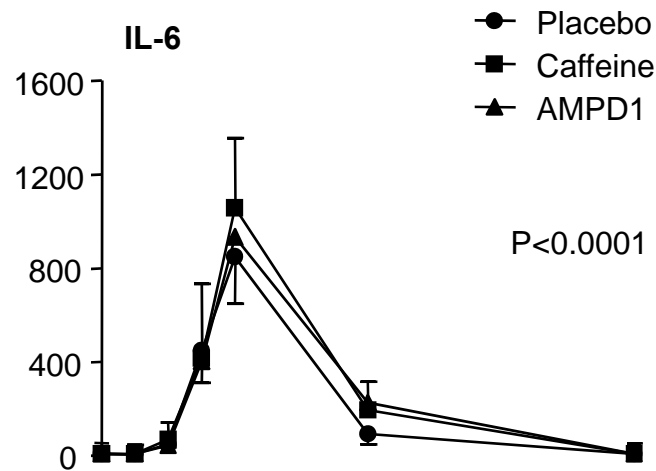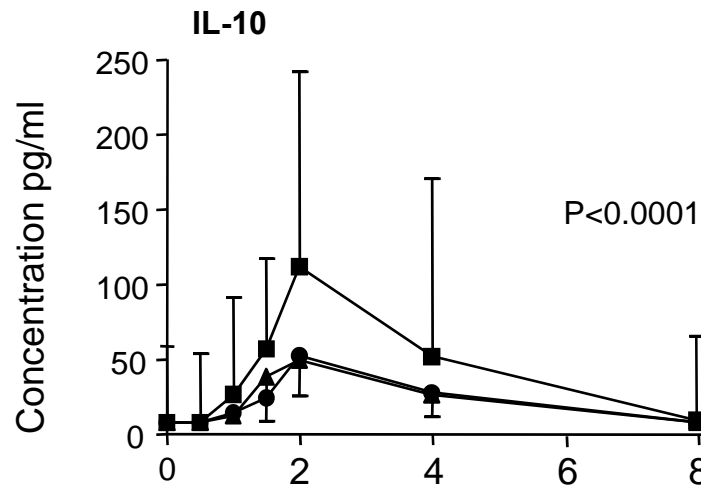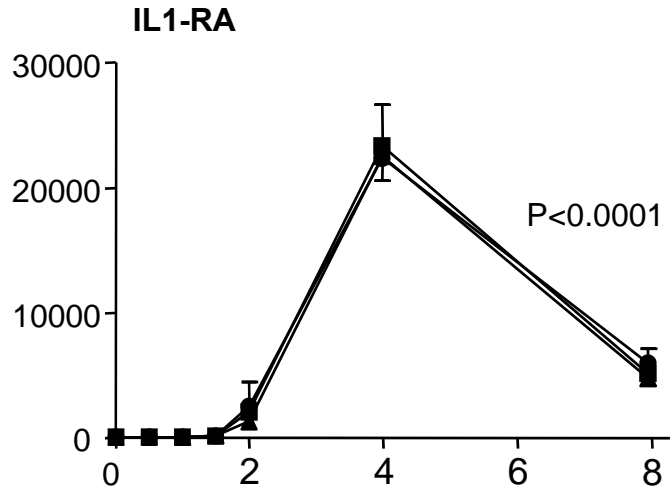

Time (hrs) after LPS administration

Supplement: MOESM2 [file 9732786]
